1

# The effect of carbon subsidies on marine planktonic niche partitioning and recruitment during biofilm assembly

Charles Pepe-Ranney<sup>1</sup>, Edward Hall<sup>2,\*</sup>

<sup>1</sup>*Cornell University, Department of Crop and Soil Sciences, Ithaca, NY, USA*

<sup>2</sup>*Colorado State University, Natural Resource and Ecology Laboratory, Fort Collins, CO, USA*

Correspondence\*:

Edward Hall

Colorado State University, Natural Resource and Ecology Laboratory, Fort Collins, CO 80523-1499, USA, ed.hall@colostate.edu

## 2 ABSTRACT

3 The influence of resource availability on planktonic and biofilm microbial community  
4 membership is poorly understood. Heterotrophic bacteria derive some to all of their organic  
5 carbon (C) from photoautotrophs while simultaneously competing for inorganic nutrients such  
6 as phosphorus (P) or nitrogen (N). Therefore, C inputs have the potential to shift the competitive  
7 balance of aquatic microbial communities by increasing the resource space available to  
8 heterotrophic bacteria (more C) while decreasing the resource space available to algae (less  
9 mineral nutrients due to increased competition from osmotrophic heterotrophs). To test how  
10 resource dynamics affect membership of planktonic communities and assembly of biofilm  
11 communities we amended a series of flow-through mesocosms with C and P to alter the  
12 availability of C among treatments. Each mesocosm was fed with unfiltered seawater and  
13 incubated with sterile glass substrate for biofilm formation. We used 454 pyrosequencing of  
14 bacterial 16S and 23S plastid genes to ask how resource driven shifts in the pool size of  
15 each community affected community membership and structure. The highest C treatment had  
16 the lowest planktonic algal abundance yet highest planktonic bacterial abundance and highest  
17 biofilm biomass. Resource amendments did not have a significant effect on alpha diversity in  
18 either the planktonic or biofilm communities. Rather the biofilm communities consistently had  
19 higher alpha diversity than the planktonic communities in all mesocosms. Bacterioplankton and  
20 biofilm membership was distinct in all but the highest C treatment where biofilm and planktonic  
21 communities increasingly resembled each other over time. Unlike the bacteria, algal biofilm and  
22 plankton communities displayed distinct microbial membership and structure in all treatments  
23 including the highest C treatment. Our results suggest that even though resource amendments  
24 affect community membership, microbial lifestyle (biofilm or planktonic) places a significantly  
25 stronger constraint on community assembly and membership.

26 **Keywords:** microbial ecology, 16S, 23S, planktonic, biofilm, carbon subsidies, resource stoichiometry

## 1 INTRODUCTION

27 Biofilms are diverse and complex microbial consortia that are the rule rather than the exception for  
28 microbial lifestyle in many environments. Large and small-scale architectural features of biofilms play an  
29 important role in their ecology and influence their role in localized biogeochemical cycles (Battin et al.,

2007). While fluid mechanics have been shown to be important drivers of biofilm structure and assembly (Hdl et al., 2011; Besemer et al., 2009; Battin et al., 2003), it is less clear how other abiotic factors such as resource availability affect biofilm assembly. Aquatic biofilms are initiated with seed propagules that originate within the planktonic community (Hdl et al., 2011; McDougald et al., 2011). Thus, how resource amendments influence planktonic communities has the potential to influence the formation of microbial biofilms during community assembly.

In a crude sense, biofilm and planktonic microbial communities can be broken into two key groups: phototrophic eukaryotes and cyanobacteria (hereafter "photoautotrophs") and bacteria and archaea. This dichotomy, while somewhat artificial (i.e. cyanobacteria are bacteria), has been shown to be a powerful paradigm for understanding community shifts across ecosystems of varying trophic state (Cotner and Biddanda, 2002). Heterotrophic bacteria meet some to all of their organic carbon (C) requirements from photoautotroph produced C while simultaneously competing with photoautotrophs for limiting nutrients such as phosphorous (P). The presence of external C inputs, such as terrigenous C leaching from the watershed (Jansson et al., 2008; Karlsson et al., 2012) or C exudates derived from macrophytes (Stets and Cotner, 2008a,b), can alleviate bacterioplankton reliance on photoautotroph derived C and shift the relationship from commensal and competitive to strictly competitive (see Stets and Cotner, 2008a, Figure 1). Under this mechanism increased C supply should increase the resource space available to the bacteria and lead to increased competition for mineral nutrients, decreasing nutrients available for photoautotrophs – assuming that bacteria are superior competitors for limiting nutrients as has been observed (see Cotner and Wetzel, 1992, Figure 1). These dynamics should result in the increase in bacterial biomass relative to the photoautotroph biomass along a gradient of increasing labile C inputs. We refer to this differential allocation of limiting resources among components of the microbial community as niche partitioning, in reference to the n-dimensional resource space available to members of the microbial community.

While these gross level dynamics have been discussed conceptually (Cotner and Biddanda, 2002) and to some extent demonstrated empirically (Stets and Cotner, 2008a), the effect that these shifts in the bulk biomass pool have on membership and structure of the photoautotroph and bacterial community has not been directly evaluated in planktonic or biofilm communities. In addition, how dynamics in planktonic communities are propagated to biofilms during community assembly is not well understood. Intuitively, shifts in planktonic community composition should alter the available pool that can be recruited into a biofilm. For example, if bacterioplankton diversity increases, the number of potential bacterial taxa that can be recruited to the biofilm should also increase, potentially increasing bacterial diversity within the biofilm. Similarly, a decrease in mineral nutrients available to photoautotrophs should decrease photoautotroph pool size, potentially decreasing photoautotroph diversity and therefore candidate photoautotroph taxa that are available for biofilm formation. In addition, C in excess of resource requirements may increase the production of extra cellular polysaccharides (EPS) by planktonic cells thus increasing the probability that planktonic cells are incorporated into a biofilm by adhesion. Each of these mechanisms suggest that an increase in labile C to the system should result in increased alpha diversity in both bacterioplankton and bacterial biofilm communities while decreasing alpha diversity within both planktonic and biofilm photoautotroph communities. To evaluate these ideas we designed this study to test a) if C subsidies shifted the biomass balance between autotrophs and heterotrophs within the biofilm or its seed pool (the plankton) and b) measure how these putative changes in pool size altered membership and structure of the plankton communities and affected recruitment of plankton during biofilm community assembly.

## 2 MATERIALS AND METHODS

**2.0.1 Experimental Design** We placed test tube racks in one smaller (185L, control) and 3 larger (370L) flow-through mesocosms. All mesocosms were fed directly with marine water from an inflow source in Great Bay approximately 200 m from the shore. Each mesocosm had an adjustable flow rate

that resulted in a residence time of approximately 12h. Irregular variation in inflow rate meant that flow rate varied around that target throughout the day, however, regular monitoring ensured that the entire volume of each system was flushed approximately two times per day. To provide a surface for biofilm formation we attached coverslips to glass slides using nail polish and then attached each slide to the test tube racks using office-style binder clips. Twice daily 10 ml of 37 mM KPO<sub>4</sub> and 1, 5 and 50 ml of 3.7M glucose were added to each of 3 mesocosms to achieve target C:P resource amendments of 10, 100 and 500 respectively. The goal of the resource amendments were to create a gradient of labile carbon among treatments. The same amount of P was added to each treated mesocosm to ensure that response to additions of C were not inhibited by extreme P limitation. The control mesocosm did not receive any C or P amendments.

**2.0.2 DOC and Chlorophyll Measurements** To assess the efficacy of the C additions we sampled each mesocosm twice daily during the first week of the experiment to evaluate dissolved organic C (DOC) content. After the initiation of the experiment we collected plankton on filters regularly to evaluate planktonic Chl *a* and bacterial abundance. Once it was clear that pool size of each community had been altered (day 8) we filtered plankton onto 0.2 μm filters and harvested coverslips to assess bacterial and algal biofilm community composition (16S and 23S rDNA). In addition all mesocosms were analyzed for community composition a second time (day 17) to assess how community composition of both the plankton and biofilm communities had been altered over time. Control samples were only analyzed for community composition on day 17.

Samples for dissolved organic C (DOC) analysis were collected in acid washed 50 mL falcon tubes after filtration through a 0.2 polycarbonate membrane filter (Millipore GTTP GTTP02500, Sigma Aldrich P9199) attached to a 60 mL syringe. Syringes and filters were first flushed multiple times with the control sample to prevent leaching of C from the syringe or the filter into the sample. Samples were then frozen and analyzed for organic C content with a Shimadzu 500 TOC analyzer (Wetzel and Likens, 2000). Biomass of all biofilm samples were measured by difference in pre-(without biofilm) and post-(with biofilm) weighed GF/F filters after oven drying overnight at 60C.

For Chl *a* analysis we collected plankton on GF/F filters (Whatman, Sigma Aldrich Cat. # Z242489) by filtering between 500 mL and 1L from the water column of each mesocosm for each treatment. For biofilm samples, all biofilm was gently removed from the complete area of each coverslip (3 coverslips for each treatment per sampling event) before being placed in a test tube for extraction with 90-95% acetone for 32 hours at -20C and analyzed immediately after using a Turner 10-AU fluorometer (Wetzel and Likens, 2000).

We analyzed bacterial abundance of the planktonic samples using Dapi staining and direct visualization on a Zeis Axio epifluorescence microscope after the methods of Porter and Feig (1980). Briefly, 1-3 mL of water was filtered from three separate water column samples through a 0.2 μm black polycarbonate membrane filter and post stained with a combination of Dapi and Citifluor mountant media (Ted Pella Redding, Ca) to a final concentration of 1μL mL<sup>-1</sup>.

**2.0.3 DNA extraction** For plankton, cells were collected by filtering between 20 – 30 mL of water onto a 0.2 μm pore-size polycarbonate filter (Whatman Nucleopore 28417598, Sigma-Aldrich cat# WHA110656). For biofilm communities, biomass from the entire coverslip area of three separate slides was collected and combined in an eppendorf tube by gentle scrapping the slip surface with an ethanol rinsed and flamed razor blade. DNA from both the filter and the biofilm was extracted using a Mobio Power Soil DNA isolation kit (MoBio Cat. # 12888).

**2.0.4 PCR** Samples were amplified for pyrosequencing using a forward and reverse fusion primer. The forward primer was constructed with (5'-3') the Roche A linker, an 8-10bp barcode, and the forward gene specific primer sequence. The reverse fusion primer was constructed with (5'-3') a biotin molecule, the Roche B linker and the reverse gene specific primer sequence. The gene specific primer pair for

bacterial SSU rRNA genes was 27F/519R (Lane, 1991). The primer pair p23SrV\_f1/p23SrV\_r1 was used to target 23S rRNA genes on plastid genomes (Sherwood and Presting, 2007). Amplifications were performed in 25  $\mu$ l reactions with Qiagen HotStar Taq master mix (Qiagen Inc, Valencia, California), 1  $\mu$ l of each 5  $\mu$ M primer, and 1  $\mu$ l of template. Reactions were performed on ABI Veriti thermocyclers (Applied Biosystems, Carlsbad, California) under the following thermal profile: 95°C for 5 min, then 35 cycles of 94°C for 30 sec, 54°C for 40 sec, 72°C for 1 min, followed by one cycle of 72°C for 10 min and 4°C hold. Amplification products were visualized with eGels (Life Technologies, Grand Island, New York). Products were then pooled equimolar and each pool was cleaned with Diffinity RapidTip (Diffinity Genomics, West Henrietta, New York), and size selected using Agencourt AMPure XP (BeckmanCoulter, Indianapolis, Indiana) following Roche 454 protocols (454 Life Sciences, Branford, Connecticut). Size selected pools were then quantified and 150 ng of DNA were hybridized to Dynabeads M-270 (Life Technologies) to create single stranded DNA following Roche 454 protocols (454 Life Sciences). Single stranded DNA was diluted and used in emPCR reactions, which were performed and subsequently enriched. Sequencing followed established manufacture protocols (454 Life Sciences).

## 2.1 SEQUENCE QUALITY CONTROL AND ANALYSIS

**2.1.1 Quality Control** The 16S/23S sequence collections were demultiplexed and sequences with sample barcodes not matching expected barcodes were discarded. We used the maximum expected error metric (Edgar, 2013) calculated from sequence quality scores to cull poor quality sequences from the dataset. Specifically, we discarded any sequence with a maximum expected error count greater than 1 after truncating to 175 nt. The forward primer and barcode was trimmed from the remaining reads. We checked that all primer trimmed, error screened and truncated sequences were derived from the same region of the LSU or SSU rRNA gene (23S and 16S sequences, respectively) by aligning the reads to Silva LSU or SSU rRNA gene alignment ("Ref" collection, release 115) with the Mothur (Schloss et al., 2009) NAST-algorithm (DeSantis et al., 2006) aligner and inspecting the alignment coordinates. Reads falling outside the expected alignment coordinates were culled from the dataset. Remaining reads were trimmed to consistent alignment coordinates such that all reads began and ended at the same position in the SSU rRNA gene and screened for chimeras with UChime in "denovo" mode (Edgar et al., 2011) via the Mothur UChime wrapper.

**2.1.2 Taxonomic annotations** Sequences were taxonomically classified using the UClust (Edgar, 2010) based classifier in the QIIME package (Caporaso et al., 2010) with the Greengenes database and taxonomic nomenclature (version "gg\_13.5" provided by QIIME developers, 97% OTU representative sequences and corresponding taxonomic annotations, (McDonald et al., 2012)) for 16S reads or the Silva LSU database (Ref set, version 115, EMBL taxonomic annotations, (Quast et al., 2013)) for the 23S reads as reference. We used the default parameters for the algorithm (i.e. minimum consensus of 51% at any rank, minimum sequence identity for hits at 90% and the maximum accepted hits value was set to 3).

**2.1.3 Clustering** Reads were clustered into OTUs following the UParse pipeline. Specifically USearch (version 7.0.1001) was used to establish cluster centroids at a 97% sequence identity level from the quality controlled data and map quality controlled reads to the centroids. The initial centroid establishment algorithm incorporates a quality control step wherein potentially chimeric reads are not allowed to become cluster seeds. Additionally, we discarded singleton reads because it is difficult to assess the quality of singleton reads and this quality control parameter in addition to maximum expected error screening has proven to be similarly useful if not superior for reducing 454 sequencing error as "denoising" (Edgar, 2013). Moreover, two popular "denoising" algorithms have been shown to add sequencing errors while correcting others sometimes in a nearly equal ratio (Bragg et al., 2012). Eighty-eight and 98% of quality controlled reads could be mapped back to our cluster seeds at a 97% identity cutoff for the 16S and 23S sequences, respectively.

169 *2.1.4 Alpha and Beta diversity analyses* Alpha diversity calculations were made using PyCogent  
 170 Python bioinformatics modules (**Knight et al.**, 2007). Rarefaction curves show average OTU counts  
 171 from 25 re-samplings at intervals of 10 sequences for each sample. Beta diversity analyses were made  
 172 using Phyloseq (**McMurdie and Holmes**, 2014) and its dependencies (**Oksanen et al.**, 2013). A sparsity  
 173 threshold of 25% was used for ordination of both plastid 23S and bacterial 16S libraries. Additionally,  
 174 we discarded any OTUs from the 23S data that could not be annotated as belonging in the Eukaryota or  
 175 cyanobacteria for differential abundance, ordination and Adonis analyses. Cyanobacterial DNA sequences  
 176 were removed from 16S sequence collections for ordination, Adonis and differential abundance analyses.  
 177 All DNA sequence based results were visualized using GGPlot2 (**Wickham**, 2009). Adonis tests and  
 178 principal coordinate ordinations were performed using the Bray-Curtis similarity measure for pairwise  
 179 library comparisons. Adonis tests employed the default value for number of permutations (999) ("adonis"  
 180 function in Vegan R package, **Oksanen et al.** (2013)). Principal coordinates of OTUs were found by  
 181 averaging site principal coordinate values for each OTU with OTU relative abundance values (within  
 182 sites) as weights. The principal coordinate OTU weighted averages were then expanded to match the  
 183 site-wise variances (**Oksanen et al.**, 2013).

184 *2.1.5 Identifying Enriched OTUs* We used an RNA-Seq differential expression statistical framework  
 185 to find OTUs enriched in the given sample classes (R package DESeq2 developed by **Love et al.** (2014))  
 186 (for review of RNA-Seq differential expression statistics applied to microbiome OTU count data see  
 187 **McMurdie and Holmes** (2014)). We use the term "differential abundance" coined by **McMurdie and**  
 188 **Holmes** (2014) to denote OTUs that have different proportion means across sample classes. We were  
 189 particularly interested in two sample classes: 1) lifestyle (biofilm or planktonic) and, 2) high C (C:P =  
 190 500) versus not high C (C:P = 10, C:P = 100 and C:P = control). A differentially abundant OTU would  
 191 have a proportion mean in one class that is statistically different from its proportion mean in another.  
 192 This differential abundance could mark an enrichment of the OTU in either sample class and the direction  
 193 of the enrichment is apparent in the sign (positive or negative) of the fold change for the OTU. Here  
 194 we use  $\log_2$  of the proportion mean ratio (means are derived from OTU proportions for all samples in  
 195 each given class) as our differential abundance metric. Differential abundance is moderated by DESeq2  
 196 such that fold change can be used to rank OTUs by magnitude of the sample class affect (i.e. OTUs with  
 197 high proportion mean differences but also high within sample class proportion variance will not produce  
 198 misleadingly large differential abundance values). The DESeq2 RNA-Seq statistical framework has been  
 199 shown to improve power and specificity when identifying differentially abundant OTUs across sample  
 200 classes in microbiome experiments **McMurdie and Holmes** (2014).

201 The specific specific DESeq2 (**Love et al.**, 2014) parameters we used were as follows: All dispersion  
 202 estimates from DESeq2 were calculated using a local fit for mean-dispersion. Native DESeq2 independent  
 203 filtering was disabled in favor of explicit sparsity filtering. The sparsity thresholds that produced the  
 204 maximum number of OTUs with adjusted p-values for differential abundance below a false discovery rate  
 205 of 10% were selected for biofilm versus planktonic sequence 16S/plastid 23S library comparisons. Cook's  
 206 distance filtering was also disabled when calculating p-values with DESeq2. We used the Benjamini-  
 207 Hochberg method to adjust p-values for multiple testing (**Benjamini and Hochberg**, 1995). Identical  
 208 DESeq2 methods were used to assess enriched OTUs from relative abundances grouped into high C (C:P  
 209 = 500) or low C (C:P  $\leq$  500 and control) categories.

210 IPython Notebooks with computational methods used to create all figures and tables as well as taking  
 211 raw sequences through quality control preprocessing are provided at the following url:

212 [http://nbviewer.ipython.org/github/chuckpr/BvP\\_manuscript\\_figures](http://nbviewer.ipython.org/github/chuckpr/BvP_manuscript_figures).

213 Version information for all R libraries is provided at the end of each IPython Notebook.

### 3 RESULTS

#### 3.1 BULK COMMUNITY CHARACTERISTICS

We first assessed the effect of the resource treatments on the dissolved chemistry and bulk community characteristics of the plankton and the biofilms. Dissolved organic C (DOC) levels in the control and lowest C treatment (C:P=10) remained below 2  $\mu\text{moles C L}^{-1}$  throughout the course of the experiment. The higher two C treatments (C:P 100 and 500) resulted in changes in the DOC concentration of the water column. In the intermediate treatment (C:P 100) DOC increased on the second day and then returned to the same level as the lower two treatments for the remainder of the experiment. In the high C (C:P 500) treatment DOC levels climbed gradually from baseline levels on the second day of the experiment to ca. 4  $\mu\text{moles L}^{-1}$  on the sixth day of the experiment.

This increase in DOC in the higher C treatments was associated with decreases in planktonic Chl *a* in each treatment (Figure 2a), however there was no significant difference in biofilm Chl *a* among treatments (Figure 2b). In combination with the decrease in planktonic Chl *a* on the 6th day of the experiment the highest C treatment had approximately 4-fold higher planktonic bacterial abundance than the control and the 10  $\mu\text{M C}$  treatment (Figure 2d). Similarly, biofilms had significantly higher total biomass in the high C treatment compared to the other treatments (Figure 2c). Thus the shift in resource C:P altered the pool size of both the photoautotroph and bacterial communities. Clear differences in bacterial and photoautotroph pool size among treatments allowed us to address how shifts in pool sizes were related to community membership and structure within and among plankton and biofilm communities.

#### 3.2 PLANKTONIC AND BIOFILM COMMUNITY STRUCTURE

**3.2.1 Alpha diversity** We evaluated alpha diversity in all treatments for both the plankton and the biofilm communities using rarefaction curves. Rarefaction curves showed bacterial and photoautotroph OTU richness was consistently higher in the biofilm compared to the planktonic communities (Figure 3). For both the photoautotroph and bacterial sequence datasets the biofilm and planktonic communities had the fewest OTUs in the highest C treatment (C:P = 500) (Figure 3).

**3.2.2 Community membership biofilm versus plankton** Bacterial community membership between the plankton and biofilm communities was notably different for all treatments except for the highest C treatment where the plankton and biofilm communities at day 17 were more similar to each other than any other community (Figure 4). Photoautotroph plankton and biofilm communities were also composed of different OTUs however the similarity among photoautotroph plankton and biofilm communities in the highest C treatment was not observed as it was for the bacterial communities (Figure 4).

In bacterial libraries, sequences were distributed into 636 OTUs; 58% of quality controlled sequences fell into the top 25 OTUs in order of decreasing sum of relative abundance across all samples. 23S plastid rRNA gene sequences were distributed into 359 OTUs; 71% of sequences fell into the top 25 OTUs sorted by mean relative abundance across all samples.

To investigate differences in the community's structure and membership between the bacterial biofilm and overlying planktonic communities we identified the most disproportionately enriched OTUs in biofilm compared to the planktonic communities and vice versa. When relative mean of OTU abundance were calculated between planktonic versus biofilm lifestyles the most enriched OTUs were consistently in planktonic samples (with respect to biofilm) (Figure 5). This is consistent with the higher alpha diversity in biofilm communities compared to planktonic communities and evidence that sequence counts were spread across a greater diversity of taxa in the biofilm libraries compared to the planktonic libraries (i.e. biofilm communities had higher evenness than planktonic communities). Of the top five enriched bacterial OTUs between the two lifestyles (biofilm or plankton), one is annotated as *Bacteroidetes*, one *Gammaproteobacteria*, one *Betaproteobacteria*, one *Alphaproteobacteria* and one *Actinobacteria* and all five were enriched in the planktonic libraries relative to biofilm (Table 1). Of the 25 most enriched OTUs

among lifestyles only two bacterial OTU centroid sequences shared high sequence identity ( $\geq 97\%$ ) with cultured isolates ("OTU.32" and "OTU.48", Table 1).

We similarly assessed membership among biofilm and plankton photoautotroph communities. Photoautotroph 23S plastid rRNA gene sequence libraries also clustered strongly by lifestyle (Figure 4). Biofilm libraries were predominantly enriched in *Stramenopile* OTUs whereas planktonic libraries were enriched in *Haptophyceae*, *Cryptophyta* and *Viridiplantae* OTUs based on OTU positions in sample ordination space (Figure 4, see Ordination Methods). When photoautotroph OTUs were ordered by differential abundance between lifestyles (see Figure 5), 16 of the top 25 OTUs were enriched in the biofilm and 9 were enriched in the planktonic samples. Fourteen of these 16 biofilm enriched OTUs were *Stramenopiles* of class *Bacillariophyta*, the remaining OTUs were classified as members of the *Chlorophyta* and *Dinophyceae*. The 9 planktonic enriched OTUs (above) were distributed into the *Viridiplantae* (5 OTUs), *Cryptophyta* (1 OTUs), *Haptophyceae* (1 OTU), *Stramenopiles* (1 OTU) and cyanobacteria (1 OTU). Unlike differences among bacterial lifestyles the 10 most enriched photoautotroph OTUs between lifestyles were evenly split between planktonic and biofilm enriched OTUs. As with the bacteria, photoautotroph OTU proportion mean ratios between lifestyles are qualitatively consistent with OTU positions in sample ordination space (see Figures 5 and 6)

The separation in community membership among biofilm and planktonic communities is supported statistically by the Adonis test (Anderson, 2001) for both the bacterial and photoautotroph libraries (p-value 0.003 and 0.002, respectively). The lifestyle category represents 18% and 45% of variance for pairwise sample distances in bacterial and photoautotroph libraries, respectively. The Adonis result is also consistent with lifestyle (biofilm versus planktonic) clustering along the first principal component for the photoautotroph libraries but not for the bacterial libraries (Figure 4).

**3.2.3 Community membership high C** Although community membership was predominately driven by lifestyle we also investigated how resource amendments affected community membership and structure. To do this we calculated differential abundance values for OTUs between a high C and low C sample class. Because the abiotic (e.g. DOC) and all biomass indicators (e.g. biomass pool size) were only significantly different in the highest resource C:P treatment we compared resource C:P = 500 (high C) to all other mesocosms (i.e. control, C:P=10 and C:P=100 - low C). Nine OTUs were enriched for in the high C treatment relative to low C. Four of the 9 high C enriched OTUs were annotated as *Alteromonadales*, 3 as *Campylobacterales* and 1 each into *Vibrionales* and *Pseudomonadales*. The most enriched OTU in low C mesocosms was annotated as belonging to the "HTCC2188" candidate order and shared 99% identity with a 16S sequence annotated as "marine gamma proteobacterium HTCC2089" (accession AY386332).

## 4 DISCUSSION

### 4.1 BIOMASS POOL SIZE

The goal of this study was to evaluate how changes in available C affected the biomass pool size, membership and structure of planktonic and biofilm communities. Our results suggest that C subsidies increased bacterial biomass in both plankton and biofilm communities as predicted. Carbon subsidies also resulted in decreased photoautotroph biomass in the plankton community, but there was no significant change in photoautotroph biomass of the biofilm communities among resource treatments. The changes in the biomass pool size that did occur were consistent with changing relationships (commensal to competitive) between the autotrophic and heterotrophic components of the plankton communities but not necessarily of the biofilm communities. While we recognize that other mechanisms may drive the shift in biomass pool size of these two components of the microbial community (e.g. increased grazing pressure on the algae with C additions, or production of secondary metabolites by the bacteria that inhibit algal growth) previous studies Stets and Cotner (2008a); Cotner and Biddanda (2002) and the data

reported here suggest that altered nutrient competition is the most parsimonious explanation for this shift in biomass pool size.

## 4.2 BIOFILM AND PLANKTON ALPHA AND BETA DIVERSITY

Beyond changes in the biomass pool size of each community we explored how shifts in resource C affected a) the membership and structure of each community, and b) the recruitment of plankton during biofilm community assembly. We highlight three key results that we find important for understanding the assembly of aquatic biofilms. First, biofilm community richness was higher than planktonic community richness (Figure 3) in all mesocosms. Second, for the control, C:P = 10 and C:P = 100 resource treatments the membership and structure of the bacterial biofilm and plankton communities were more similar within a lifestyle (plankton versus biofilm) than within a resource treatment. However, for the bacteria in the highest C treatment (C:P = 500) both membership and structure of biofilm and planktonic communities at day 17 were more similar to each other than to communities from other treatments (Figure 4). Third, C subsidies acted differently on the photoautotroph and bacterial communities. Specifically while the highest level of C subsidies (C:P = 500) resulted in a merging of membership in the bacterioplankton and bacterial biofilm communities the same merging of membership was not observed for the photoautotroph biofilm and plankton communities which had distinct membership in all treatments.

We propose two potential mechanisms that could result in the increased diversity of the biofilm communities relative to the planktonic communities. First, it is possible that the planktonic community composition of our flow through incubators was dynamic in time. In this case the biofilm community would represent a temporally integrated sample of the planktonic organisms moving through the reactor resulting in higher apparent alpha diversity (i.e. mass effects would be the dominant assembly mechanism). Second, the biofilm environment may disproportionately enrich for the least abundant members of the of the planktonic community. In this case it is probable that the biofilm would incorporate the most abundant members from the planktonic community (i.e. mass effects) but also select and enrich (i.e. species sorting) the least abundant members of the planktonic community resulting in a higher level of detectable alpha diversity. The second mechanism would result if the biofilm environment represented a more diverse habitat including sharply delineated oxygen, nutrient and pH gradients that are not present in the planktonic environment. In this case the more diverse habitat would be able to support a more diverse community due to an abundance of additional environmental habitats (i.e. niches). We evaluated the first mechanism by comparing membership among the plankton samples taken 9 days apart (t=8 and t=17). While bacterioplankton communities were not identical between the time points (Figure 4), communities within a treatment were more similar to each other between timepoints than any other bacterioplankton community (treatment or timepoint). In addition, the control and two lowest C treatments (C:P=10 and C:P=100) separated completely from biofilm communities in principle coordinate space (Bray-Curtis distance metric). This suggests that the biofilm community was not integrating variable bacterioplankton community membership, but rather was at least in part selecting for a community that was composed of distinct populations when compared to the most abundant members of the plankton community. As noted above, in the highest C treatment (C:P = 500) the bacterial biofilm and plankton community membership had significant overlap at the final timepoint (Figure 4). However, bacterioplankton membership for the highest C treatment among timepoints (8 and 17 days) were also qualitatively as similar to each other as any other community. Thus, variable planktonic community composition among timepoints would not explain the higher diversity observed in the biofilm compared to the planktonic community. Rather, two results point to enrichment of planktonic community members within the biofilm as the mechanism for higher diversity in the biofilm compared to the plankton. First, the increasing similarity between the plankton and the biofilm communities over time in the highest resource C treatment suggests that *in situ* resource conditions were sufficient to alter the relative abundance of the populations within each community. Second, an analysis of the OTU relative abundance in biofilm and planktonic libraries where OTUs are sorted by planktonic sample rank (Figure 6) shows that the least abundant members of the plankton community were routinely highly abundant within the biofilm community. This was true for both photoautotroph and bacterial communities, at all treatment levels and both timepoints. While we did

not (could not) specifically measure niche diversity within the biofilm communities our results suggest that the biofilm habitat selected for unique members of the photoautotroph and bacterioplanktonic community that were in very low abundance in the planktonic habitat but readily became major constituents of the biofilm community.

Very few studies have simultaneously evaluated the relationship among membership and/or diversity of the plankton and the biofilm community from complex environmental microbial communities. One notable study looked at planktonic community composition and biofilm formation on glass beads placed for three weeks in three boreal freshwater streams (**Besemer et al.**, 2012). While that study system is markedly different than our study, the analyses and questions addressed in each study were sufficiently similar to merit comparison. **Besemer et al.** (2012) concluded that the biofilm community membership was most likely driven by species sorting over mass effects. This is consistent with what we report here. However, in the **Besemer et al.** (2012) study the authors reported that planktonic diversity was significantly higher relative to biofilm diversity (the opposite of what we found in our study). Given the differences in the source of the planktonic community among studies, this result is not surprising. While biofilm communities were established on glass beads in **Besemer et al.** (2012) and glass slides (this study) over a similar time period (21 days, **Besemer et al.** (2012) and 17 days this study) the origin of the planktonic community in each study was very different. The **Besemer et al.** (2012) study was conducted in three boreal streams during snow melt when connectivity between the terrestrial and aquatic habitats was high and potentially highly variable depending on how hydrologic pathways differed among precipitation events. In this study the source community was a marine intake located approximately 200 meters from the shore during July when communities are more stable over the 17 day period of the incubation. A separate study conducted in alpine and sub-alpine streams of the Rocky Mountains clearly showed that stream plankton communities reflected localized precipitation events and could be traced largely to sources of soil communities of drainages within the watershed (**Portillo et al.**, 2012). While planktonic communities in lake ecosystems can be linked to soil communities in the watershed, as residence time of the system slows the relative influence of species sorting increases. Thus, in headwater ecosystems stream plankton communities can often be composed primarily of soil organisms (**Crump et al.**, 2012). In addition to the diverse source communities the **Besemer et al.** (2012) study sampled the plankton community at multiple timepoints and integrated the samples before sequencing, further increasing community richness as compared to the current study where the plankton community was sampled and analyzed only at two independent timepoints. Indeed, when we pool OTU counts from all planktonic libraries and compare the rarefaction curve of the pooled planktonic libraries (photoautotrophs and bacteria) against sample-wise biofilm libraries, we find more total bacterial and photoautotroph planktonic OTUs than in any given single biofilm sample. It appears, however, that sample-wise bacterial biofilm rarefaction curves may exceed the integrated planktonic curve upon extrapolation and most exceed the integrated planktonic curve at sampling depths where data is present for the biofilm and integrated planktonic library (Figure 7). This result is consistent with our conclusion that temporal heterogeneity in the plankton was not sufficient to explain the higher diversity in the biofilm sample but would explain the relative differences between planktonic and biofilm diversity found in **Besemer et al.** (2012) compared to this study.

In addition, for this study, it is important to note that biofilm community richness peaked at the intermediate treatment (C:P = 100) and appeared to decrease over time although with only two time points it was unclear how pronounced this effect was nor is it possible to assess the statistical significance of this effect (Figure 3). Since biomass of the plankton and the biofilm increased with increasing C subsidies the intermediate peak in OTU richness is consistent with a classic productivity-diversity relationship that has been shown for many ecosystems and communities both microbial and otherwise. However, as with other experiments with this result our experimental design did not allow us to tell whether resources drove productivity that drove changes in diversity or whether resources drove diversity which altered productivity. Rather, we note that as diversity decreased in the highest C treatment, bacterioplankton and biofilm membership became increasingly similar. This suggests that environments that contained high amounts of labile C selected for fewer dominant taxa, overwhelming the lifestyle species sorting mechanisms that appeared to dominate biofilm community assembly in all other treatments. Similarly, while we did not measure extracellular polymeric substances (EPS), direct microscopy showed that

401 planktonic cells in the highest C treatment (C:P = 500) were surrounded by what appeared to be EPS.  
402 Because biofilm EPS appeared also to increase moving from the low to high C treatments it is possible  
403 that more abundant planktonic cells were more readily incorporated into biofilms due both to increased  
404 "stickiness" of the planktonic cells as well as the biofilm itself. While we did not observe flocculating  
405 DOC which has been shown to dominate high DOC environments in nature, we did measure a substantial  
406 increase in DOC in the C:P = 500 treatment which was more than 2-fold higher than any of the other  
407 treatments. Thus additional adhesion of the plankton and the biofilm may also explain the merging of the  
408 planktonic and biofilm bacterial membership in the highest C treatment.

### 4.3 LIFESTYLE (BIOFILM OR PLANKTONIC) ENRICHED OTUS

409 There are only a few studies that attempt to compare biofilm community composition and the overlying  
410 planktonic community (Besemer et al., 2007, 2012; Jackson et al., 2001; Lyautey et al., 2005). Those  
411 studies illustrate community composition among the two habitats are unique with very few taxa found in  
412 both. This is consistent with our findings in this experimental system with a natural marine planktonic  
413 source community. In addition, our study also evaluated photoautotroph community composition which  
414 showed a similar result suggesting that both the photoautotroph and bacterial biofilm communities are  
415 comprised phylogenetically distinct organisms that exist in low abundance in the surrounding habitat  
416 (i.e. the plankton) but are readily enriched in the biofilm lifestyle. Most of the biofilm enriched  
417 photoautotroph OTUs were *Bacillariophyta* although there were also many *Bacillariophyta* OTUs enriched  
418 in the planktonic libraries. We also found *Cryptophyta* and *Viridiplantae* were more uniformly enriched  
419 in the planktonic photoautotroph libraries. It appears that these broad taxonomic groups were selected  
420 against in biofilms under our experimental conditions. Bacterial OTUs enriched in planktonic samples  
421 displayed more dramatic differential abundance patterns than bacterial OTUs enriched in biofilm samples,  
422 but, biofilm enriched bacterial OTUs were spread across a greater phylogenetic breadth (Figure 5). This  
423 is also consistent with the idea of greater niche diversity in the biofilm environment as opposed to the  
424 plankton. Greater niche diversity should select for a more diverse set of taxa but individual taxa would  
425 not be as numerically dominant as in a more uniform environment such as the planktonic environment.  
426 At the Order level, enriched bacterial OTUs tended to have members that were enriched in both the  
427 plankton and the biofilm suggesting the phylogenetic coherence of lifestyle is not captured at the level  
428 of Order. It should be noted however that taxonomic annotations in reference databases and therefore  
429 environmental sequence collections show little equivalency in phylogenetic breadth between groups at  
430 the same taxonomic rank (Schloss and Westcott, 2011). Unfortunately, at higher taxonomic resolution  
431 (e.g. Genus-level), groups did not possess a sufficient number of OTUs to evaluate coherence between  
432 taxonomic annotation and lifestyle. Carbon amendments did not affect photoautotroph library membership  
433 and structure to the same degree as it affected bacterial library composition. As expected, bacterial OTUs  
434 enriched in the high C amended mesocosm (C:P = 500) include OTUs in classic copiotroph families such  
435 as *Alteromonadales* and *Pseudomonadaceae*. Interestingly, the most depleted OTU in the high C treatments  
436 is annotated as being in the HTCC2188 order of the *Gammaproteobacteria* and shares 99% sequence  
437 identity with another "HTCC" strain (accession AY386332). HTCC stands for 'high throughput culture  
438 collection' and is a prefix for strains cultured under low nutrient conditions (Cho and Giovannoni, 2004;  
439 Cannon and Giovannoni, 2002).

### 4.4 CONCLUSION

440 In summary this study shows that changes in low resolution community level dynamics are concurrent  
441 with changes in the underlying constituent populations that compose them. We found that autotrophic  
442 pools and heterotrophic pools responded differently to amendments of labile C as hypothesized. Notably  
443 while C amendments altered both pool size and membership of the bacterial communities we did not  
444 see similar dynamics within the photoautotroph communities. Planktonic photoautotrophs decreased  
445 in response to C amendments presumably in response to increased competition for mineral nutrients  
446 from a larger bacterial community, however there was not a similar decrease in biofilm photoautotroph

community. In addition membership of the photoautotroph communities between the plankton and biofilm lifestyles did not become more similar in the photoautotrophs as it did for the bacteria in the highest C treatment. Consistent with a growing body of work our results suggest that complex environmental biofilms are a unique microbial community that form from taxa (both heterotrophs and autotrophs alike) that are found in low abundance in the neighboring communities. This membership was affected by resource amendments for heterotrophic but not autotrophic microbes and then only in the most extreme resource environment. This suggests that lifestyle is a major division among environmental microorganisms and although biofilm forming microbes must travel in planktonic form at some point, reproductive success and metabolic contributions to biogeochemical processes comes from those taxa primarily if not exclusively while they are part of a biofilm. Our results point to lifestyle (planktonic or biofilm) as an important trait that explains a portion of the exceptional diversity found in snapshots used to characterize environmental microbial communities in space and time.

## 5 ACKNOWLEDGEMENTS

This research was conducted as part of the 2010 Marine Biological Laboratory's Microbial Diversity Course. Funding was supplied by the MBL, the Bernard Davis Endowed Scholarship Fund, and the Selman A. Waksman Endowed Scholarship. We would like to thank Dan Buckley and Steve Zinder for organizing the course, Marshall Otter, Mathew Erickson, Hugh Ducklow and Jay T. Lennon for analytical support and the Austrian FWF MICDIF award to Tom Battin for salary support.

## REFERENCES

- Anderson, M. J. (2001), A new method for non-parametric multivariate analysis of variance, *Austral Ecology*, 26, 1, 32–46, doi:10.1111/j.1442-9993.2001.01070.pp.x
- Battin, T. J., Kaplan, L. A., Denis, N. J., and Hansen, C. M. (2003), Contributions of microbial biofilms to ecosystem processes in stream mesocosms., *Nature*, 426, 439–42
- Battin, T. J., Sloan, W. T., Kjelleberg, S., Daims, H., Head, I. M., Curtis, T. P., et al. (2007), Microbial landscapes: new paths to biofilm research., *Nat. Rev. Microbiol.*, 5, 76–81
- Benjamini, Y. and Hochberg, Y. (1995), r, *J. R. Stat. Soc.*, 57, 1, 289–300, doi:10.2307/2346101
- Besemer, K., Hdl, I., Singer, G., and Battin, T. J. (2009), Architectural differentiation reflects bacterial community structure in stream biofilms., *ISME J*, 3, 1318–24
- Besemer, K., Peter, H., Logue, J. B., Langenheder, S., Lindstrm, E. S., Tranvik, L. J., et al. (2012), Unraveling assembly of stream biofilm communities., *ISME J*, 6, 1459–68
- Besemer, K., Singer, G., Limberger, R., Chlup, A. K., Hochedlinger, G., Hodl, I., et al. (2007), Biophysical controls on community succession in stream biofilms, *Appl. Environ. Microbiol.*, 73, 15, 4966–4974, doi:10.1128/aem.00588-07
- Bragg, L., Stone, G., Imelfort, M., Hugenholtz, P., and Tyson, G. W. (2012), Fast, accurate error-correction of amplicon pyrosequences using Acacia., *Nat. Methods*, 9, 425–6
- Caporaso, J. G., Kuczynski, J., Stombaugh, J., Bittinger, K., Bushman, F. D., Costello, E. K., et al. (2010), QIIME allows analysis of high-throughput community sequencing data., *Nat. Methods*, 7, 335–6
- Cho, J. C. and Giovannoni, S. J. (2004), Cultivation and growth characteristics of a diverse group of oligotrophic marine gammaproteobacteria, *Appl. Environ. Microbiol.*, 70, 1, 432–440, doi:10.1128/aem.70.1.432-440.2004
- Connon, S. A. and Giovannoni, S. J. (2002), High-throughput methods for culturing microorganisms in very-low-nutrient media yield diverse new marine isolates, *Appl. Environ. Microbiol.*, 68, 8, 3878–3885, doi:10.1128/aem.68.8.3878-3885.2002
- Cotner, J. B. and Biddanda, B. A. (2002), Small players large role: microbial influence on biogeochemical processes in pelagic aquatic ecosystems, *Ecosystems*, 5, 2, 105–121, doi:10.1007/s10021-001-0059-3

- 490 Cotner, J. B. and Wetzel, R. G. (1992), Uptake of dissolved inorganic and organic bphosphorus  
491 compounds by phytoplankton and bacterioplankton, *Limnol. Oceanogr.*, 37, 2, 232–243, doi:10.4319/lo.  
492 1992.37.2.0232
- 493 Crump, B. C., Amaral-Zettler, L. A., and Kling, G. W. (2012), Microbial diversity in arctic freshwaters is  
494 structured by inoculation of microbes from soils., *ISME J*, 6, 1629–39
- 495 DeSantis, T. Z. J., Hugenholtz, P., Keller, K., Brodie, E. L., Larsen, N., Piceno, Y. M., et al. (2006),  
496 NAST: a multiple sequence alignment server for comparative analysis of 16S rRNA genes., *Nucleic  
497 Acids Res.*, 34, W394–9
- 498 Edgar, R. C. (2010), Search and clustering orders of magnitude faster than BLAST., *Bioinformatics*, 26,  
499 2460–1
- 500 Edgar, R. C. (2013), UPPARSE: highly accurate OTU sequences from microbial amplicon reads., *Nat.  
501 Methods*, 10, 996–8
- 502 Edgar, R. C., Haas, B. J., Clemente, J. C., Quince, C., and Knight, R. (2011), UCHIME improves  
503 sensitivity and speed of chimera detection., *Bioinformatics*, 27, 2194–200
- 504 Hdl, I., Hdl, J., Wrman, A., Singer, G., Besemer, K., and Battin, T. J. (2011), Voronoi tessellation captures  
505 very early clustering of single primary cells as induced by interactions in nascent biofilms, *PLoS ONE*,  
506 6, 10, e26368, doi:10.1371/journal.pone.0026368
- 507 Jackson, C. R., Churchill, P. F., and Roden, E. E. (2001), Successional changes in bacterial assemblage  
508 structure during epilithic biofilm development, *Ecology*, 82, 2, 555–566, doi:10.1890/0012-9658(2001)  
509 082[0555:scibas]2.0.co;2
- 510 Jansson, M., Hickler, T., Jonsson, A., and Karlsson, J. (2008), Links between terrestrial primary  
511 production and bacterial production and respiration in lakes in a climate gradient in subarctic sweden,  
512 *Ecosystems*, 11, 3, 367–376, doi:10.1007/s10021-008-9127-2
- 513 Karlsson, J., Berggren, M., Ask, J., Byström, P., Jonsson, A., Laudon, H., et al. (2012), Terrestrial organic  
514 matter support of lake food webs: Evidence from lake metabolism and stable hydrogen isotopes of  
515 consumers, *Limnol. Oceanogr.*, 57, 4, 1042–1048, doi:10.4319/lo.2012.57.4.1042
- 516 Knight, R., Maxwell, P., Birmingham, A., Carnes, J., Caporaso, J. G., Easton, B. C., et al. (2007),  
517 PyCogent: a toolkit for making sense from sequence., *Genome Biol.*, 8, R171
- 518 Lane, D. J. (1991), 16S/23S rRNA sequencing, *Nucleic Acid Techniques in Bacterial Systematics*, 125–  
519 175
- 520 Love, M. I., Huber, W., and Anders, S. (2014), Moderated estimation of fold change and dispersion for  
521 RNA-Seq data with DESeq2, doi:10.1101/002832
- 522 Lyautey, E., Jackson, C. R., Cayrou, J., Rols, J., and Garabétian, F. (2005), Bacterial community  
523 succession in natural river biofilm assemblages, *Microb. Ecol.*, 50, 4, 589–601, doi:10.1007/  
524 s00248-005-5032-9
- 525 McDonald, D., Price, M. N., Goodrich, J., Nawrocki, E. P., DeSantis, T. Z., Probst, A., et al. (2012), An  
526 improved Greengenes taxonomy with explicit ranks for ecological and evolutionary analyses of bacteria  
527 and archaea., *ISME J*, 6, 610–8
- 528 McDougald, D., Rice, S. A., Barraud, N., Steinberg, P. D., and Kjelleberg, S. (2011), Should we stay or  
529 should we go: mechanisms and ecological consequences for biofilm dispersal., *Nat. Rev. Microbiol.*,  
530 10, 39–50
- 531 McMurdie, P. J. and Holmes, S. (2014), Waste not, want not: why rarefying microbiome data is  
532 inadmissible., *PLoS Comput. Biol.*, 10, e1003531
- 533 Oksanen, J., Blanchet, F. G., Kindt, R., Legendre, P., Minchin, P. R., O'Hara, R. B., et al. (2013), vegan:  
534 Community Ecology Package, r package version 2.0-10
- 535 Portillo, M. C., Anderson, S. P., and Fierer, N. (2012), Temporal variability in the diversity and  
536 composition of stream bacterioplankton communities., *Environ. Microbiol.*, 14, 2417–28
- 537 Quast, C., Pruesse, E., Yilmaz, P., Gerken, J., Schweer, T., Yarza, P., et al. (2013), The SILVA ribosomal  
538 RNA gene database project: improved data processing and web-based tools., *Nucleic Acids Res.*, 41,  
539 D590–6
- 540 Schloss, P. D. and Westcott, S. L. (2011), Assessing and improving methods used in operational taxonomic  
541 unit-based approaches for 16s rRNA gene sequence analysis, *Appl. Environ. Microbiol.*, 77, 10, 3219–  
542 3226, doi:10.1128/aem.02810-10

- 543 Schloss, P. D., Westcott, S. L., Ryabin, T., Hall, J. R., Hartmann, M., Hollister, E. B., et al. (2009),  
 544 Introducing mothur: open-source, platform-independent, community-supported software for describing  
 545 and comparing microbial communities., *Appl. Environ. Microbiol.*, 75, 7537–41  
 546 Sherwood, A. R. and Presting, G. G. (2007), Universal primers amplify a 23s rDNA plastid marker in  
 547 eukaryotic algae and cyanobacteria, *Journal of Phycology*, 43, 3, 605–608, doi:10.1111/j.1529-8817.  
 548 2007.00341.x  
 549 Stets, E. G. and Cotner, J. B. (2008a), Littoral zones as sources of biodegradable dissolved organic carbon  
 550 in lakes, *Can. J. Fish. Aquat. Sci.*, 65, 11, 2454–2460, doi:10.1139/f08-142  
 551 Stets, E. G. and Cotner, J. B. (2008b), The influence of dissolved organic carbon on bacterial phosphorus  
 552 uptake and bacteria-phytoplankton dynamics in two Minnesota lakes, *Limnol. Oceanogr.*, 53, 1, 137–  
 553 147, doi:10.4319/lo.2008.53.1.0137  
 554 Wetzel, R. G. and Likens, G. E. (2000), *Limnological Analyses* (Springer New York), doi:10.1007/  
 555 978-1-4757-3250-4  
 556 Wickham, H. (2009), *ggplot2* (Springer New York), doi:10.1007/978-0-387-98141-3

## FIGURES

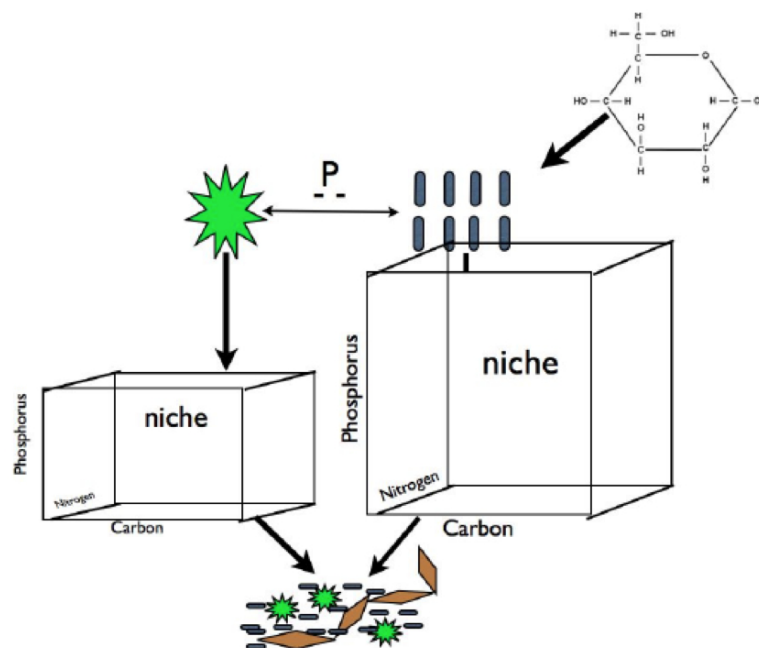

**Figure 1.** Carbon subsidies in the form of glucose alleviate the dependence of heterotrophic bacteria on photoautotroph derived C exudates. This should result in an increase in resource space and biomass for bacteria and a decrease in resource space and biomass for photoautotrophs due to increased competition for mineral nutrients (for simplicity we illustrate competition for P but this is equally applicable other elements that may limit primary production). We hypothesized that this predicted change in biomass pool size of these two groups will result in changes in the plankton community composition of both groups that will propagate to the composition of biofilm communities for both groups. We refer to shifts in the demand and availability of resources among components of the microbial community as 'partitioning'.

**Table 1.** Results for BLAST search against Living Tree Project (top 25 lifestyle enriched bacterial OTUs)

| OTU ID  | Phylum         | $\log_2(\text{plank} : \text{biof})$ | Species Name                                          | BLAST %ID | ACC          |
|---------|----------------|--------------------------------------|-------------------------------------------------------|-----------|--------------|
| OTU.103 | Bacteroidetes  | 7.78                                 | <i>Zunongwangia profunda</i>                          | 89.66     | DQ855467     |
| OTU.105 | Proteobacteria | 8.09                                 | <i>Microbulbifer yueqingensis</i>                     | 90.14     | GQ262813     |
| OTU.11  | Proteobacteria | 9.59                                 | <i>Methylobacillus glycogenes</i>                     | 93.96     | FR733701     |
| OTU.123 | Proteobacteria | 8.96                                 | <i>Flexibacter roseolus</i>                           | 83.46     | AB078062     |
|         |                |                                      | <i>Flexibacter elegans</i>                            | 83.46     | AB078048     |
| OTU.165 | Proteobacteria | -7.05                                | <i>Kangiella spongicola</i>                           | 92.05     | GU339304     |
|         |                |                                      | <i>Kangiella marina</i>                               | 92.05     | JN559388     |
| OTU.166 | Proteobacteria | -7.52                                | <i>Halomonas halocynthiae</i>                         | 92.62     | AJ417388     |
| OTU.19  | Proteobacteria | 9.31                                 | <i>Neptuniibacter caesariensis</i>                    | 90.07     | AY136116     |
| OTU.195 | Proteobacteria | 7.17                                 | <i>Methylobacillus glycogenes</i>                     | 94.63     | FR733701     |
| OTU.20  | Proteobacteria | 9.07                                 | <i>Ruegeria halocynthiae</i>                          | 96.15     | HQ852038     |
|         |                |                                      | <i>Phaeobacter daeponensis</i>                        | 95.49     | DQ981486     |
| OTU.207 | Proteobacteria | 9.30                                 | <i>Methylobacillus glycogenes</i>                     | 91.28     | FR733701     |
| OTU.223 | Proteobacteria | 7.94                                 | <i>Methyloferula stellata</i>                         | 87.02     | FR686343     |
|         |                |                                      | <i>Methylocapsa aurea</i>                             | 87.02     | FN433469     |
|         |                |                                      | <i>Beijerinckia indica</i> subsp. <i>lacticogenes</i> | 87.02     | AJ563931     |
|         |                |                                      | <i>Beijerinckia indica</i> subsp. <i>indica</i>       | 87.02     | CP001016     |
|         |                |                                      | <i>Beijerinckia derxii</i> subsp. <i>venezuelae</i>   | 87.02     | AJ563934     |
| OTU.26  | Actinobacteria | 8.58                                 | <i>Corallomonas stylophorae</i>                       | 88.17     | GU569894     |
| OTU.31  | Bacteroidetes  | 9.63                                 | <i>Sedimentimix flava</i>                             | 91.33     | AB255370     |
|         |                |                                      | <i>Kordia algicida</i>                                | 91.33     | AY195836     |
| OTU.32  | Bacteroidetes  | 8.90                                 | <i>Bizionia echini</i>                                | 97.32     | FJ716799     |
| OTU.36  | Actinobacteria | 9.55                                 | <i>Pseudoclavibacter soli</i>                         | 95.95     | AB329630     |
| OTU.369 | Actinobacteria | 7.93                                 | <i>Agrococcus terreus</i>                             | 96.0      | FJ423764     |
| OTU.40  | Bacteroidetes  | 7.68                                 | <i>Aureitalea marina</i>                              | 91.33     | AB602429     |
| OTU.44  | Proteobacteria | 8.92                                 | <i>Glaciecola mesophila</i>                           | 92.62     | AJ488501     |
|         |                |                                      | <i>Aestuariibacter salexigens</i>                     | 92.67     | AY207502     |
|         |                |                                      | <i>Aestuariibacter halophilus</i>                     | 92.67     | AY207503     |
| OTU.48  | Actinobacteria | 7.28                                 | <i>Microterricola viridarii</i>                       | 97.33     | AB282862     |
|         |                |                                      | <i>Leifsonia pindariensis</i>                         | 97.33     | AM900767     |
| OTU.62  | Proteobacteria | 8.75                                 | <i>Haliea rubra</i>                                   | 91.55     | EU161717     |
|         |                |                                      | <i>Congregibacter litoralis</i>                       | 91.55     | AAOA01000004 |
|         |                |                                      | <i>Chromatocurvus halotolerans</i>                    | 91.55     | AM691086     |
| OTU.69  | Proteobacteria | 9.34                                 | <i>Sneathiella glossodoripedis</i>                    | 87.94     | AB289439     |
| OTU.71  | Bacteroidetes  | 7.40                                 | <i>Aequorivita sublithincola</i>                      | 95.77     | AF170749     |
| OTU.83  | Actinobacteria | 7.27                                 | <i>Microbacterium invictum</i>                        | 92.47     | AM949677     |
| OTU.84  | Proteobacteria | -7.44                                | <i>Alcanivorax dieselolei</i>                         | 93.29     | AY683537     |
|         |                |                                      | <i>Alcanivorax balearicus</i>                         | 93.29     | AY686709     |
| OTU.89  | Actinobacteria | 7.17                                 | <i>Corallomonas stylophorae</i>                       | 87.91     | GU569894     |

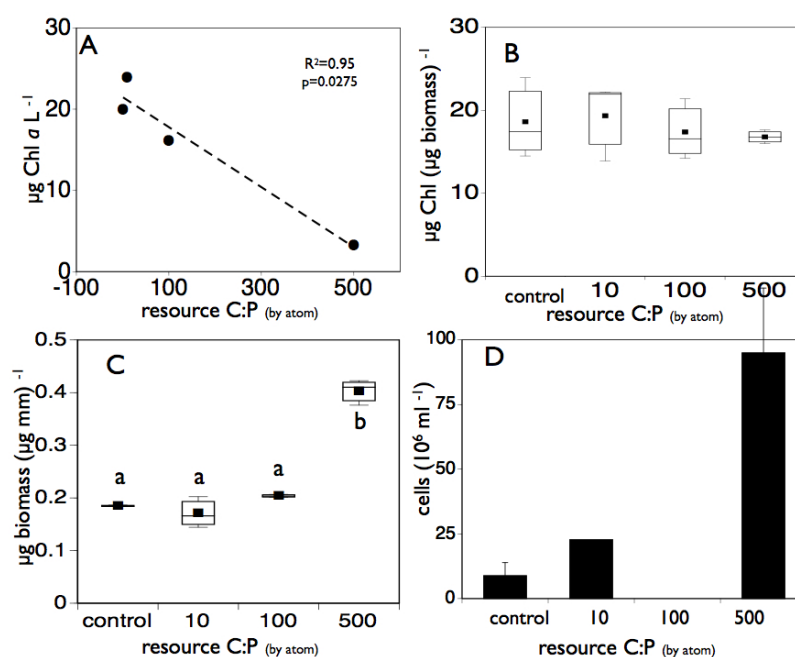

**Figure 2.** Increases in C resulted in decreases in A) planktonic photoautotroph biomass (estimated as Chl *a* but B) not photoautotroph biomass present in the biofilm *a* in each. In contrast both C) biofilm total biomass and D) number of planktonic bacterial cells increased with increasing C subsidies. Responses in treatments separated by different letters were statistically different from one another ( $p < 0.05$ ) as was the highest C:P treatment for planktonic bacterial abundance compared to the control or the C:P = 10 treatment ( $p < 0.05$ ). The bacterial abundance sample for the C:P = 100 treatment was lost before analysis and is therefore not reported in panel d.

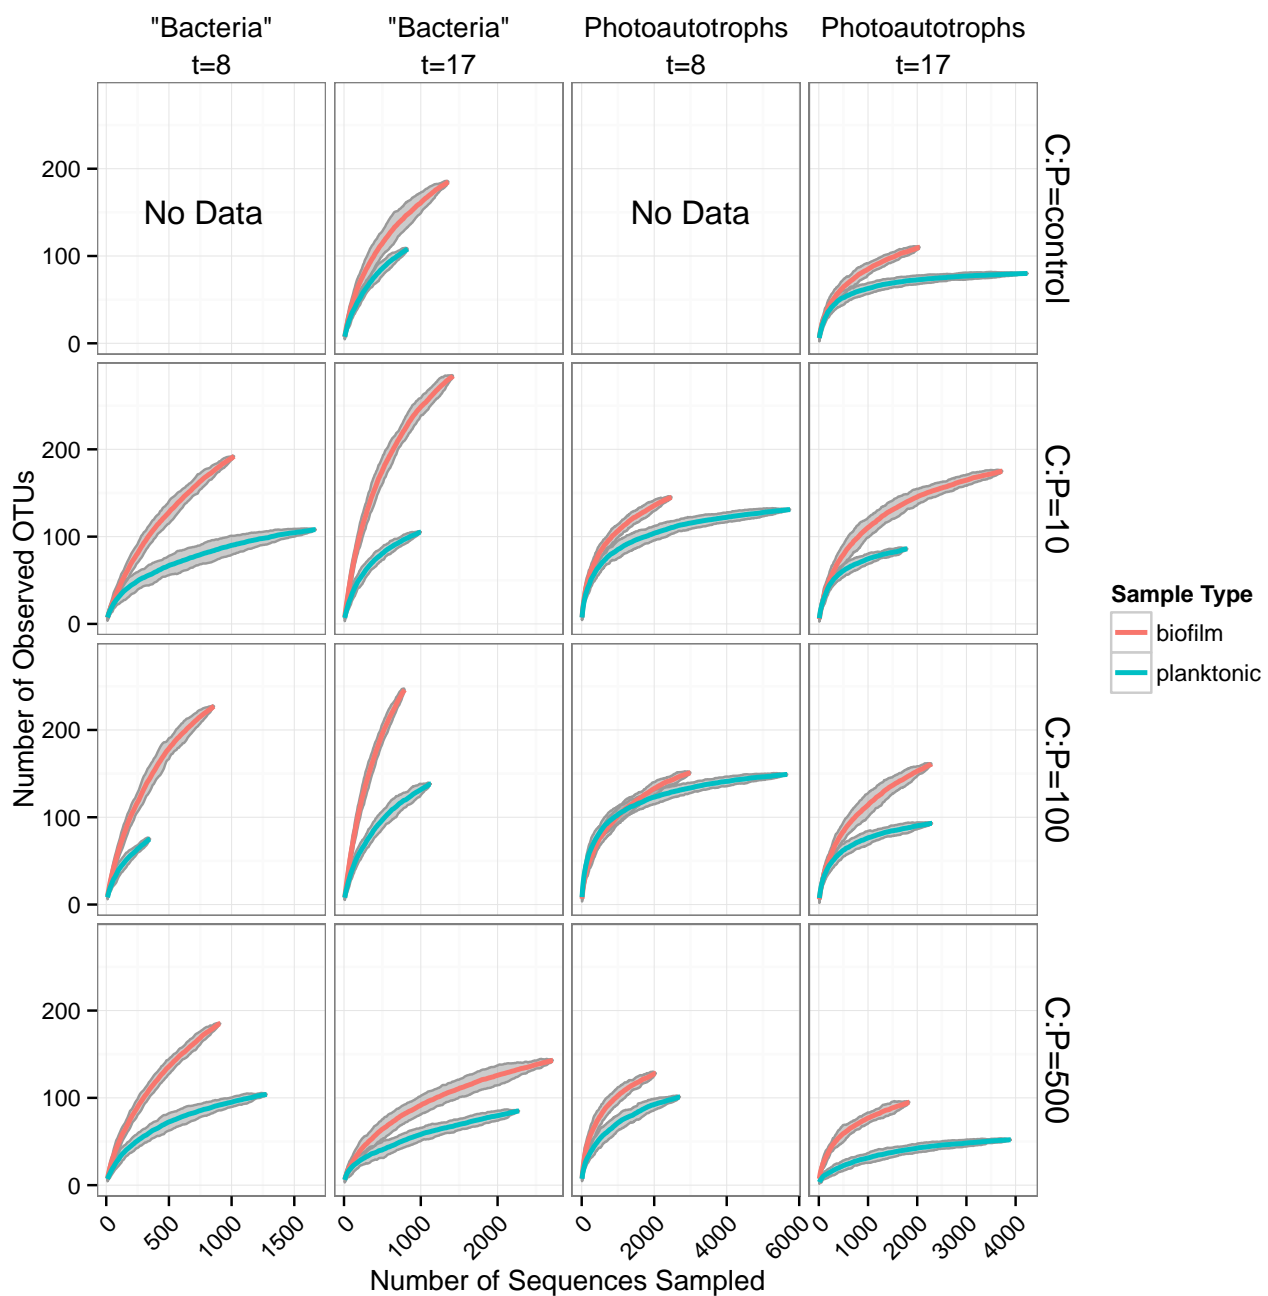

**Figure 3.** Rarefaction curves for all biofilm versus plankton libraries. Each panel represents a single C:P treatment and time point. Richness is greater for all planktonic communities when compared to corresponding biofilm communities. Gray ribbons are 99% confidence intervals around each rarefaction point based on variance from 25 re-samplings.

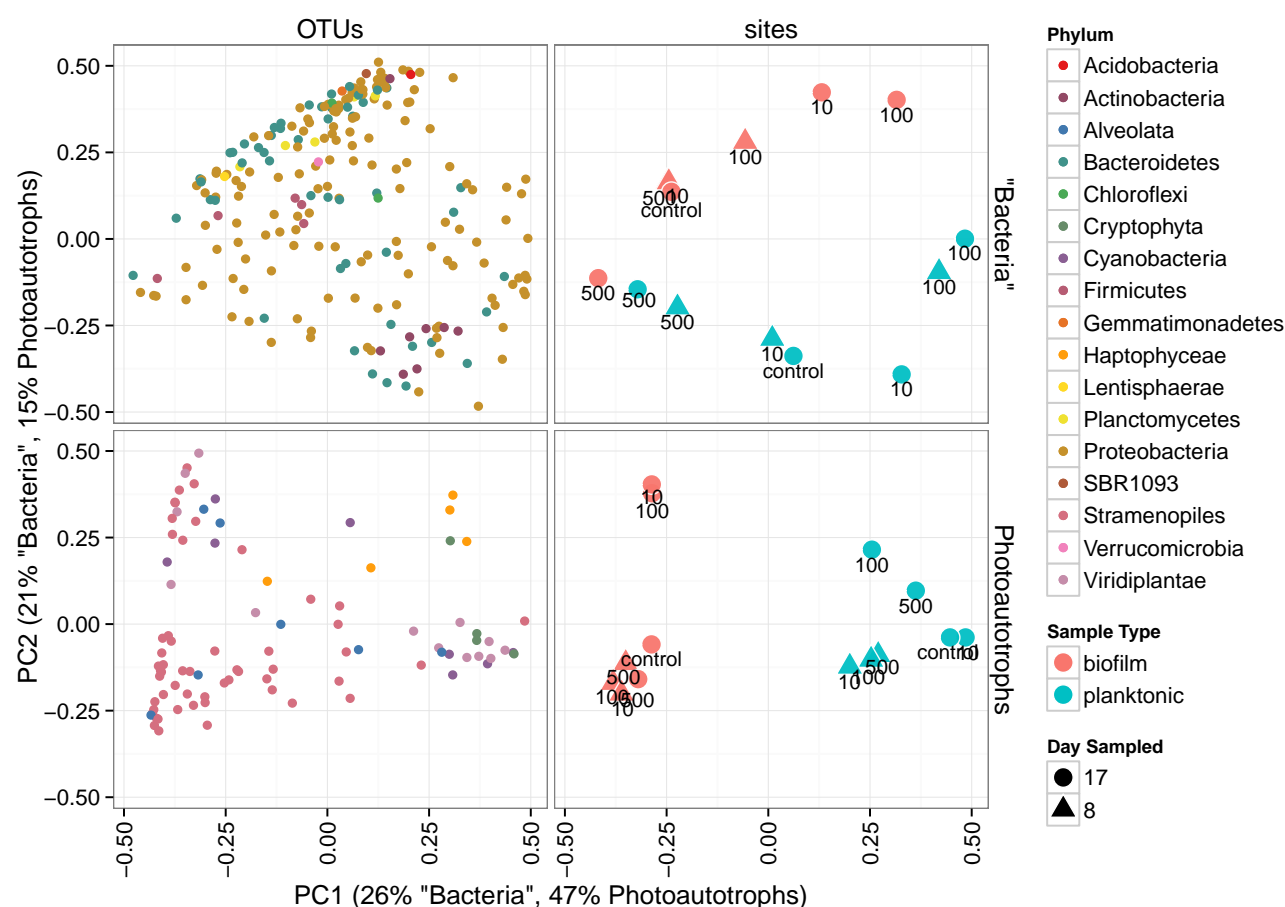

**Figure 4.** Principal coordinates ordination of bray-curtis distances for 23S rRNA plastid libraries and 16S rRNA gene libraries. OTU points are weighted principal coordinate averages (weights are relative abundance values in each sample) and the variance along each principal axis is expanded to match the site variance. Point annotations denote the amended C:P ratio for the mesocosm from which each sample was derived.

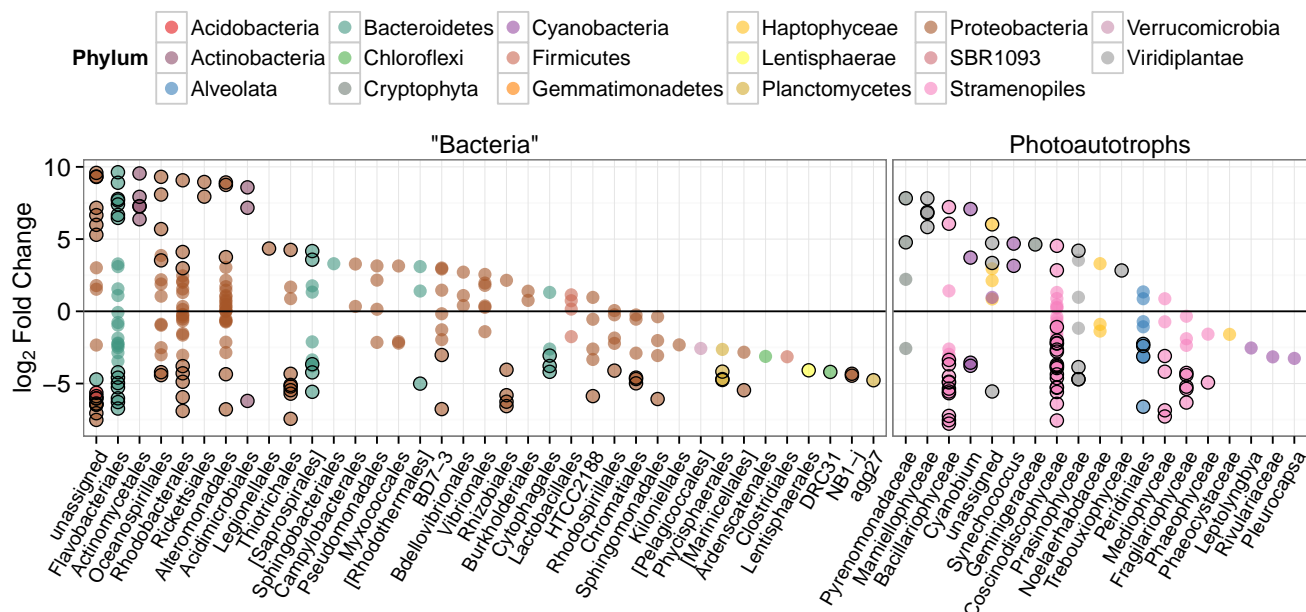

**Figure 5.**  $\log_2$  of lifestyle OTU proportion mean ratios (biofilm or plankton). Each point represents one OTU and points are grouped along the x-axis by Order. Outlined points have adjusted p-values below a false discovery rate of 0.10. Positive fold change values represents enrichment in planktonic samples.

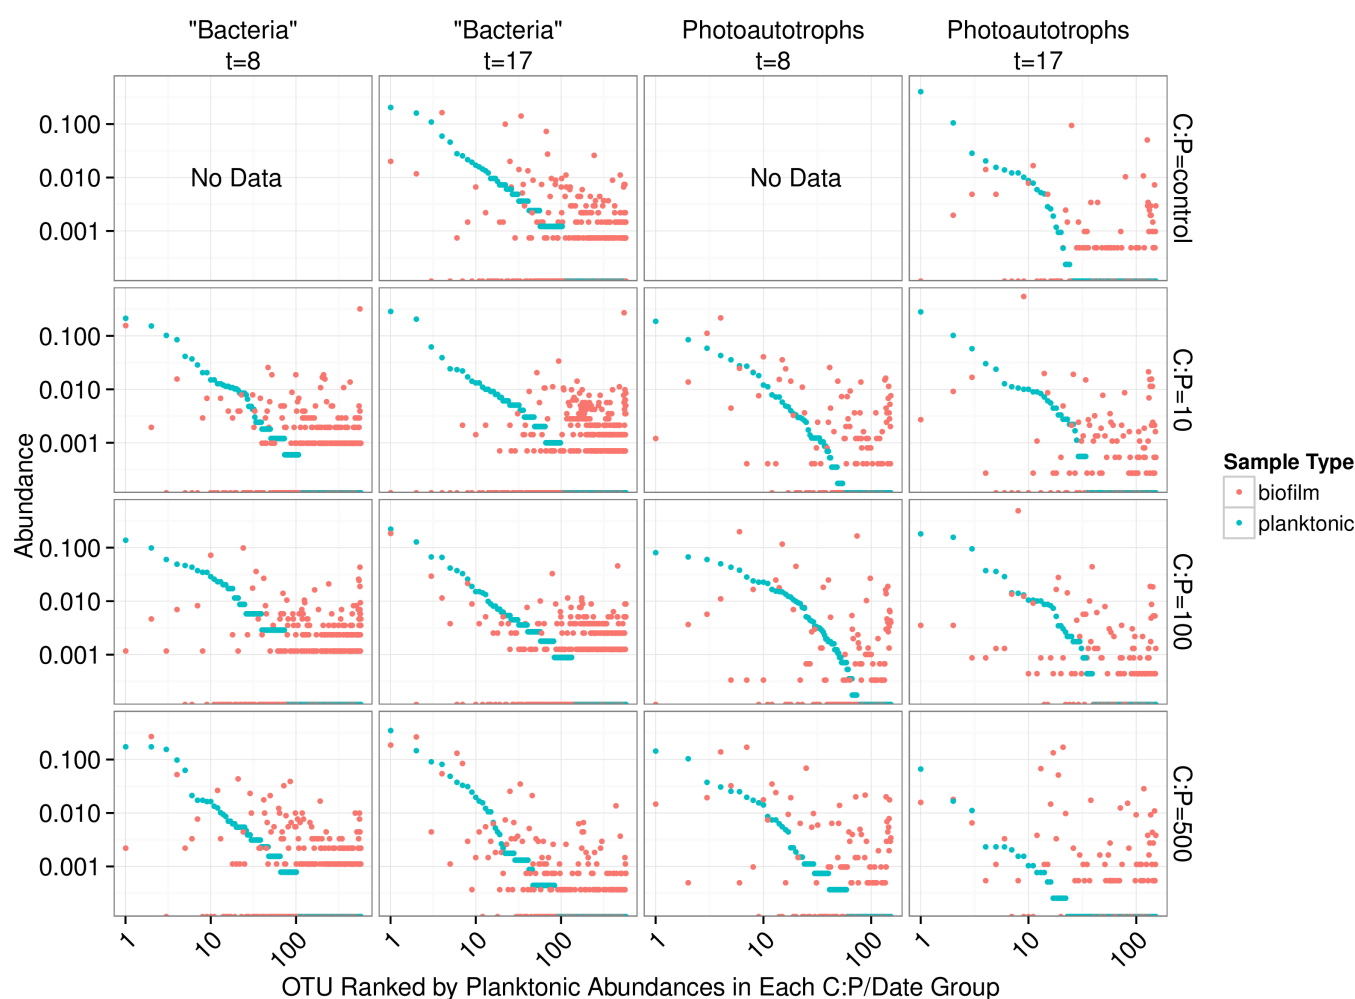

**Figure 6.** Rank abundance plots. Each panel represents a single time point and C:P. The "rank" of each OTU is based on planktonic sample relative abundance. Each position along the x-axis represents a single OTU. Both the x and y axes are scaled logarithmically.

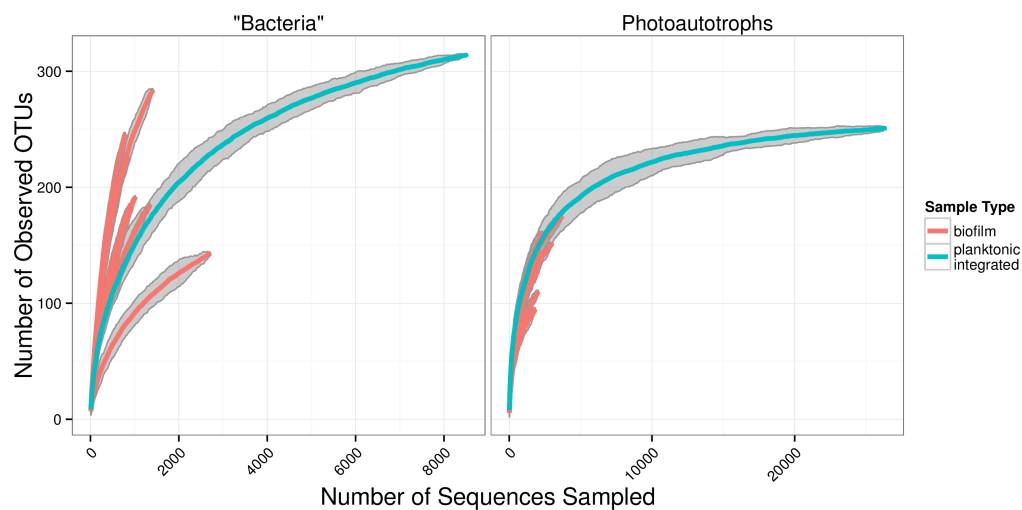

**Figure 7.** Rarefaction plots for all samples. Planktonic libraries have been integrated such that the count for each OTU is the sum of counts across all samples. Gray ribbons are 99% confidence intervals around each rarefaction point based on variance from 25 re-samplings.
